# Supplementary material
Source: publisher site journal article supplement (https://www.spandidos-publications.com/7878/downloadSupplementary)
Supplement: Supplementary file 1 [file downloadSupplementary]

## Sheet: Supplementary Table 2
Table SII. Overlap with candidates list in "PD-L1 EXPRESSION AND PD-1 CHECKPOINT PATHWAY IN CANCER".
		H1975			CL1-5			A549
Protein. IDs (https://www.uniprot.org/)	Genes	CTL (signal intensity)	GMI (signal intensity)	Fold change (GMI/CTL)	CTL (signal intensity)	GMI (signal intensity)	Fold change (GMI/CTL)	CTL (signal intensity)	GMI (signal intensity)	Fold change (GMI/CTL)
Q9NZQ7	CD274 (PD-L1)	0.0855712	0.05332	0.623107	0.681081	0.478279	0.702234	0.0220892	0.00537168	0.243181
P00533	EGFR	0.14008	0.0684105	0.488367	6.75676	4.46309	0.660537	0.675603	0.352697	0.522048
Q99836	MYD88	0.0527055	0.0826962	1.56903	0.886487	1.55705	1.75642	0.0273459	0.0506225	1.85119
P42224	STAT1	0.358717	0.547284	1.52567	18.1622	24.6309	1.35616	0.16756	0.587137	3.50403
P31749	AKT1	0.0031768	0.00522503	1.64475	0.0806379	0.129754	1.6091	0.000411586	0.00241446	5.86624
P15260	IFNGR1	0.050501	0.126157	2.49811	0.504304	1.34899	2.67496	0.0903486	0.232365	2.57187
